# Supplementary material
Source: publisher site journal article supplement (https://www.spandidos-publications.com/1285/downloadSupplementary)
Supplement: Supplementary file 1 [file downloadSupplementary]

## Sheet: Supplementary Table S3
	Table SII. Information of siRNAs used in the present study.
	Accession no.	Gene	Start	Sense	Antisense
	NM_003376	Vascular endothelial growth factor-A (VEGF-A)	1150	5’-CACGAAGUGGUGAAGUUCAUGGAUG-3’	5’-CAUCCAUGAACUUCACCACUUCGUG-3’
	NM_00101233	Midkine (MK)	706	5’-UGUCUGCUCGUUAGCUUUAAUCAAU-3’	5’-AUUGAUUAAAGCUAACGAGCAGACA-3’
	NM_004494	Hepatoma-derived growth factor (HDGF)	724	5’-CGAGGAAGGGAAGCUGGUCAUUGAU-3’	5’-AUCAAUGACCAGCUUCCCUUCCUCG-3’
			761	5’-GAGAAGAACGAGAAAGGAGCGUUGA-3’	5’-UCAACGCUCCUUUCUCGUUCUUCUC-3’
	NM_002087	Granulin (GRN)	619	5’-GGGUGCCAUCCAGUGCCCUGAUAGU-3’	5’-ACUAUCAGGGCACUGGAUGGCACCC-3’
	NM_002006	Fibroblast growth factor-2 (FGF-2)	669	5’-GAGAGAGGAGUUGUGUCUAUCAAAG-3’	5’-CUUUGAUAGACACAACUCCUCUCUC-3’
